# Supplementary material for: Distinctive Features of Orbital Adipose Tissue (OAT) in Graves’ Orbitopathy
Source: MDPI journal article supplement (doi:10.3390/ijms21239145), 2020-11-30
Supplement: s1 [file Table S5.pdf › Table S5.pdf]

| Gene                   | Forward Primer                         | Reverse Primer                      |
|------------------------|----------------------------------------|-------------------------------------|
| LEP<br>(NM_000230)     | AATGCATTGGGGAACCCT<br>GT (Ex2)         | AGGAGACTGACTGCGTGTGT<br>(Ex3)       |
| UCP1<br>(NM_021833)    | GGGGCTTCAGCGGCAAA<br>TCAG (Ex2)        | TATAAGTCCCCGTGTAGCGA<br>GGTT(Ex3)   |
| LPL<br>(NM_000237)     | GAGATTTCTCTGTATGGA<br>CC (Ex7)         | CTGCAAATGAGACACTTTCTC<br>(Ex9)      |
| LIPE<br>(NM_005357)    | ACTCAGACCAGAAAGCCC<br>TC (Ex8)         | GGGTCAGGTTCTTGAGGGAA<br>(Ex9)       |
| SCD<br>(NM_005063)     | TGCCCACCACAAGTTTTC<br>AG (Ex4)         | CATCAGCAAGCCAGGTTTGT<br>(Ex5)       |
| MFN2<br>(NM_014874)    | CGTCTATGAGCGTCTGAC<br>CT (Ex17)        | TTTCTTGTTTCATGGCGGCAA<br>(Ex18)     |
| FASN<br>(NM_004104)    | ACCACCCGCTCGGCATG<br>GCTATCT (Ex31/32) | CTTGTGGGCCGGGCAGAAG<br>GTCTT (Ex33) |
| SLC27A6<br>(NM_014031) | TAAGGGGTTCTGCTGTCC<br>TG (Ex4)         | TCACTCCAAAACCTGGCTTGC<br>(Ex5)      |
| APRT<br>(NM_000485)    | GCTGCGTGCTCATCCGAA<br>AG (Ex3)         | CCTTAAGCGAGGTCAGCTCC<br>(Ex5)       |

**Table S5. Primer for QPCR used in this study with indicated exon (Ex) location and gene access number for mRNA analysis.**
