# Supplementary figures and images for: Distinctive Features of Orbital Adipose Tissue (OAT) in Graves’ Orbitopathy
Source: MDPI journal article supplement (doi:10.3390/ijms21239145), 2020-11-30

**Figure S1**

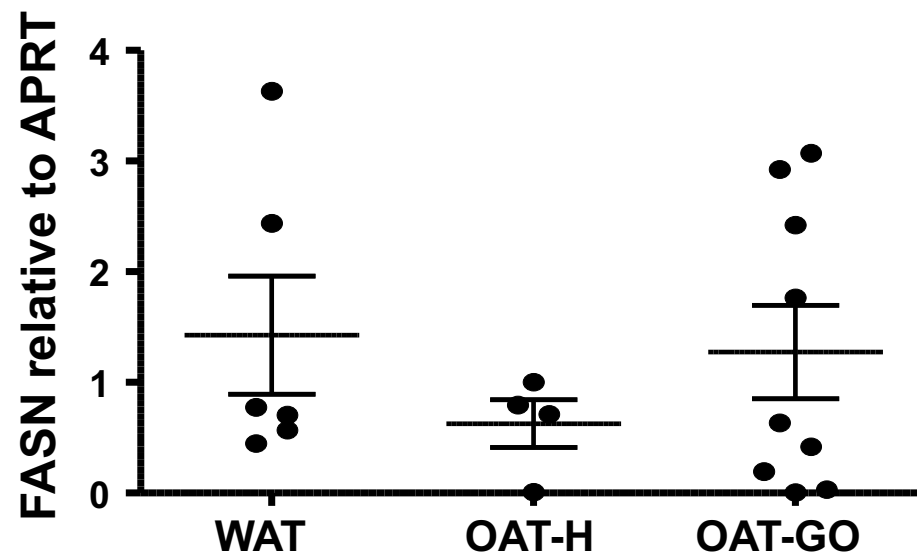

Supplement: s1 [file Figure S1.pdf › Figure S1.pdf]
